# Supplementary material
Source: PubMed Central journal article supplement (PMC4494099)
Supplement: NIHMS703583-supplement-Supl_Legend.pdf [file NIHMS703583-supplement-Supl_Legend.pdf]

**Supplemental Figure 1:** Line graph representing the mean change in eGFR for nine patients that received bardoxolone methyl treatment for at least six cycles. Error bars represent the SEM.
