# Supplementary material
Source: PubMed Central journal article supplement (PMC4494099)
Supplement: NIHMS703583-supplement-Supl_Table_1.pdf [file NIHMS703583-supplement-Supl_Table_1.pdf]

**Supplemental Table 1: Changes in Serum Creatinine Following Treatment with Bardoxolone Methyl<sup>a</sup>**

|                                                  | N  | Response Rate <sup>b</sup> | Baseline Serum Creatinine (mg/dL) | Decrease in Serum Creatinine <sup>c</sup> | Mean Baseline eGFR <sup>d</sup> (ml/min/1.73 m <sup>2</sup> ) | Increase in eGFR <sup>c</sup> |
|--------------------------------------------------|----|----------------------------|-----------------------------------|-------------------------------------------|---------------------------------------------------------------|-------------------------------|
| All Patients                                     | 36 | 86%                        | 1.0                               | 16.9% ± 1.8%                              | 74.4 ± 3.5                                                    | 26.4% ± 3.2%                  |
| Patients in 900 mg cohort                        | 20 | 100%                       | 1.0                               | 21.2% ± 2.0%                              | 73.4 ± 5.1                                                    | 33.9% ± 4.2%                  |
| eGFR <sup>e</sup> <90 ml/min/1.73 m <sup>2</sup> | 26 | 92%                        | 1.1                               | 18.3% ± 2.2%                              | 64.8 ± 3.1                                                    | 29.0% ± 3.9%                  |
| eGFR <sup>e</sup> <60 ml/min/1.73 m <sup>2</sup> | 10 | 100%                       | 1.4                               | 21.9% ± 3.2%                              | 48.7 ± 2.7                                                    | 35.6% ± 6.8%                  |
| eGFR <sup>e</sup> ≥60 ml/min/1.73 m <sup>2</sup> | 26 | 81%                        | 0.9                               | 15.0% ± 2.1%                              | 84.4 ± 2.9                                                    | 22.9% ± 3.5%                  |

<sup>a</sup> Excludes patients without baseline and Day 21 Cycle 1 serum creatinine measurements

<sup>b</sup> Percentage of patients with lower serum creatinine values on Day 21 of Cycle 1 compared to baseline

<sup>c</sup> Percent change from baseline to Day 21 of Cycle 1

<sup>d</sup> eGFR was calculated using the Modification of Diet in Renal Disease Study (MDRD) formula

<sup>e</sup> eGFR at baseline
