# Supplementary material
Source: PubMed Central journal article supplement (PMC4494099)

eGFR Change from Baseline

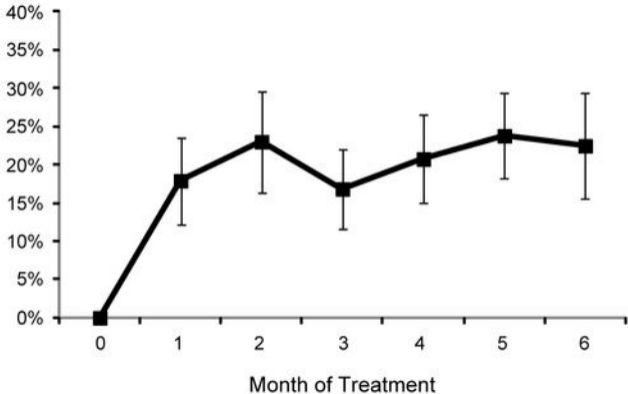

Supplement: NIHMS703583-supplement-SUpl_Figure_S1.pdf [file NIHMS703583-supplement-SUpl_Figure_S1.pdf]
